# Supplementary material
Source: ML conference proceedings conference paper supplement (https://openaccess.thecvf.com/content/CVPR2024/html/Yang_ViewFusion_Towards_Multi-View_CVPR_2024_paper.html)
Supplement: Supplementary file 1 [file Yang_ViewFusion_Towards_Multi-View_CVPR_2024_supplemental.zip]

Archive with 6 entries (6 files):
- supp_compressed/3210_supp.pdf
- supp_compressed/abo_relightning_autoregressive.mp4
- supp_compressed/gso_comparison.mp4
- supp_compressed/gso_shape.mp4
- supp_compressed/pretrain_autoregressive_disc_360_abo_spin.mp4
- supp_compressed/real_images.mp4
